# Supplementary material for: Association between different dimensions of C-reactive protein-triglyceride-glucose index and the incidence of frailty in middle-aged and elderly adults in China: A nationwide prospective cohort study
Source: Research Square preprint supplement (doi:10.21203/rs.3.rs-7463475/v1), 2025-09-04
Supplement: Supplementary file 1 [file aedb27c6f5251b7d724abe7c.docx]

**Supplemental Materials**

**Supplementary** **Table S1.** Variables used to construct the frailty index.

**Supplementary Table S2.** Sensitivity analysis excluding participants with pre-frailty at baseline.

**Supplementary Table S3.** Sensitivity analysis excluding participants whose follow-up visits occurred in 2020 to mitigate potential COVID-19-related biases.

**Supplementary Table S4.** Sensitivity analysis restricted to participants with complete covariate data.

**Supplementary Table S5.** Sensitivity analysis excluding participants who died during follow-up.

**Supplementary Table S6.** Sensitivity analysis excluding participants who developed frailty within the first 2 years of follow-up.

**Supplementary Table S1.** Variables used to construct the frailty index.

| **No** | **Description of the items** | **Cut-off value** |
| --- | --- | --- |
| 1 | Self-reported diagnosis of hypertension by a doctor | Yes = 1, No = 0 |
| 2 | Self-reported diagnosis of diabetes by a doctor |
| 3 | Self-reported diagnosis of heart attack, coronary heart disease, angina, congestive heart failure, or other heart problems by a doctor |
| 4 | Self-reported diagnosis of stroke by a doctor |
| 5 | Self-reported diagnosis of cancer by a doctor |
| 6 | Self-reported diagnosis of arthritis by a doctor |
| 7 | Self-reported diagnosis of chronic lung diseases by a doctor |
| 8 | Self-reported diagnosis of asthma by a doctor |
| 9 | Self-reported diagnosis of emotional, nervous, or psychiatric problems by a doctor |
| 10 | Self-reported diagnosis of memory-related disease by a doctor |
| 11 | Self-reported vision problems |
| 12 | Self-reported hearing problems |
| 13 | Difficulty with dressing | Did not have any problems with the activity=0; some difficulty with the activity or could not do the activity=1. |
| 14 | Difficulty with bathing or showering |
| 15 | Difficulty with eating |
| 16 | Difficulty with getting in and out of bed |
| 17 | Difficulty with using the toilet |
| 18 | Difficulty with managing money |
| 19 | Difficulty with taking medications |
| 20 | Difficulty with shopping for groceries |
| 21 | Difficulty with preparing meals |
| 22 | Difficulty with doing housework |
| 23 | Difficulty with walking 100 yards |
| 24 | Difficulty with getting up from a chair after sitting for long periods |
| 25 | Difficulty with climbing several flights of stairs without resting |
| 26 | Difficulty with lifting or carrying weights over 10 pounds/ jins |
| 27 | Difficulty with picking up a coin from the table |
| 28 | Difficulty with stooping, kneeling, or crouching |
| 29 | Difficulty with reaching arms above shoulder level |
| 30 | Self reported health | Poor/ fair = 1, excellent/ very good/ or good = 0 |
| 31 | Depressive symptoms: CESD-10 questionnaire | CESD-10 >10 =1, ≤10 =0 |
| 32 | Cognition: (memory test score + orientation test score) **/** 14 | Continuous, ranging from 0 to 1 |

Depression symptoms are evaluated using the Center for Epidemiologic Studies Depression Scale (CESD). CESD-10 is used, and the total score ranges from 0 to 30.

The memory score is calculated as the average of words that are not remembered in the immediate and delayed word recall tasks. The memory score ranges from 0 to 10. The orientation test consists of four questions about the day of the week, the month, the date of the month, and the year. Each incorrect response earns one point, resulting in a scoring range from 0 to 4. Thus, the sum of memory and orientation test scores was divided by 14 to yield a continuous cognitive variable, ranging from 0 to 1.

**Supplementary Table S2.** Sensitivity analysis excluding participants with pre-frailty at baseline.

| **Characteristic** | **Model 1** | **P-value** | **Model 2** | **P-value** | **Model 3** | **P-value** |
| --- | --- | --- | --- | --- | --- | --- |
| **HR (95%CI)** | **HR (95%CI)** | **HR (95%CI)** |
| **Frailty by CTI** |  |  |  |  |  |  |
| **CTI (per 1 unit increase)** | 1.221 (1.013, 1.471) | **0.036** | 1.170 (0.968, 1.413) | 0.104 | 1.206 (0.996, 1.461) | 0.055 |
| **Quartile CTI** |  |  |  |  |  |  |
| Q1 | Ref. |  | Ref. |  | Ref. |  |
| Q2 | 1.048 (0.757, 1.449) | 0.779 | 1.011 (0.730, 1.398) | 0.950 | 1.032 (0.746, 1.428) | 0.850 |
| Q3 | 1.261 (0.922, 1.723) | 0.146 | 1.146 (0.838, 1.568) | 0.392 | 1.153 (0.842, 1.579) | 0.374 |
| Q4 | 1.381 (1.016, 1.878) | **0.039** | 1.291 (0.949, 1.756) | 0.104 | 1.356 (0.993, 1.851) | 0.056 |
| **P for trend** |  | **0.019** |  | 0.069 |  | **0.04** |
|  |  |  |  |  |  |  |
| **Frailty by cumCTI** |  |  |  |  |  |  |
| **cumCTI (per 1 unit increase)** | 1.089 (1.015, 1.168) | **0.018** | 1.073 (0.999, 1.151) | 0.052 | 1.081 (1.006, 1.162) | **0.034** |
| **Quartile cumCTI** |  |  |  |  |  |  |
| Q1 | Ref. |  | Ref. |  | Ref. |  |
| Q2 | 1.030 (0.740, 1.433) | 0.860 | 1.015 (0.729, 1.412) | 0.931 | 1.023 (0.734, 1.424) | 0.895 |
| Q3 | 1.336 (0.977, 1.825) | 0.070 | 1.282 (0.938, 1.754) | 0.119 | 1.285 (0.938, 1.760) | 0.118 |
| Q4 | 1.467 (1.078, 1.997) | **0.015** | 1.386 (1.017, 1.889) | **0.039** | 1.442 (1.054, 1.974) | **0.022** |
| **P for trend** |  | **0.004** |  | **0.015** |  | **0.008** |
|  |  |  |  |  |  |  |
| **Frailty by CTI change** |  |  |  |  |  |  |
| **CTI change** |  |  |  |  |  |  |
| Cluster 3 | Ref. |  | Ref. |  | Ref. |  |
| Cluster 2 | 1.368 (1.063, 1.760) | 0.015 | 1.330 (1.033, 1.712) | 0.027 | 1.316 (1.021, 1.696) | 0.034 |
| Cluster 1 | 1.492 (1.099, 2.025) | **0.010** | 1.420 (1.045, 1.929) | **0.025** | 1.448 (1.062, 1.975) | **0.019** |
| **P for trend** |  | **0.006** |  | **0.016** |  | **0.013** |
| Model 1: unadjusted for any covariates | | | | | | |
| Model 2: adjusted for age, sex and marital status | | | | | | |
| Model 3: adjusted for age, sex and marital status, education level, geographic region, smoking status, drinking status, sleep duration, social activities and eGFR | | | | | | |
| Abbreviations: CTI, C-reactive protein-triglyceride-glucose index; HR, Hazard Ratio; CI, Confidence Interval; Q, quartile; Ref, reference; eGFR, estimated glomerular filtration rate. | | | | | | |

**Supplementary Table S3.** Sensitivity analysis excluding participants whose follow-up visits occurred in 2020 to mitigate potential COVID-19-related biases.

| **Characteristic** | **Model 1** | **P-value** | **Model 2** | **P-value** | **Model 3** | **P-value** |
| --- | --- | --- | --- | --- | --- | --- |
| **HR (95%CI)** | **HR (95%CI)** | **HR (95%CI)** |
| **Frailty by CTI** |  |  |  |  |  |  |
| **CTI (per 1 unit increase)** | 1.459 (1.304, 1.631) | **<0.001** | 1.400 (1.250, 1.568) | **<0.001** | 1.400 (1.248, 1.571) | **<0.001** |
| **Quartile CTI** |  |  |  |  |  |  |
| Q1 | Ref. |  | Ref. |  | Ref. |  |
| Q2 | 1.259 (1.026, 1.545) | 0.028 | 1.205 (0.982, 1.480) | 0.074 | 1.208 (0.984, 1.483) | 0.071 |
| Q3 | 1.383 (1.131, 1.691) | 0.002 | 1.277 (1.044, 1.562) | 0.018 | 1.254 (1.024, 1.536) | 0.029 |
| Q4 | 1.754 (1.445, 2.129) | **<0.001** | 1.641 (1.351, 1.992) | **<0.001** | 1.655 (1.360, 2.014) | **<0.001** |
| **P for trend** |  | **<0.001** |  | **<0.001** |  | **<0.001** |
|  |  |  |  |  |  |  |
| **Frailty by cumCTI** |  |  |  |  |  |  |
| **cumCTI (per 1 unit increase)** | 1.172 (1.124, 1.222) | **<0.001** | 1.154 (1.106, 1.205) | **<0.001** | 1.152 (1.103, 1.203) | **<0.001** |
| **Quartile cumCTI** |  |  |  |  |  |  |
| Q1 | Ref. |  | Ref. |  | Ref. |  |
| Q2 | 1.284 (1.043, 1.582) | 0.019 | 1.251 (1.016, 1.542) | 0.035 | 1.226 (0.995, 1.511) | 0.056 |
| Q3 | 1.519 (1.241, 1.860) | <0.001 | 1.422 (1.161, 1.742) | <0.001 | 1.403 (1.144, 1.720) | 0.001 |
| Q4 | 1.876 (1.542, 2.283) | **<0.001** | 1.770 (1.453, 2.155) | **<0.001** | 1.748 (1.432, 2.133) | **<0.001** |
| **P for trend** |  | **<0.001** |  | **<0.001** |  | **<0.001** |
|  |  |  |  |  |  |  |
| **Frailty by CTI change** |  |  |  |  |  |  |
| **CTI change** |  |  |  |  |  |  |
| Cluster 3 | Ref. |  | Ref. |  | Ref. |  |
| Cluster 2 | 1.327 (1.127, 1.563) | <0.001 | 1.266 (1.075, 1.492) | 0.005 | 1.245 (1.056, 1.469) | 0.009 |
| Cluster 1 | 1.834 (1.530, 2.198) | **<0.001** | 1.718 (1.432, 2.060) | **<0.001** | 1.697 (1.411, 2.041) | **<0.001** |
| **P for trend** |  | **<0.001** |  | **<0.001** |  | **<0.001** |
| Model 1: unadjusted for any covariates | | | | | | |
| Model 2: adjusted for age, sex and marital status | | | | | | |
| Model 3: adjusted for age, sex and marital status, education level, geographic region, smoking status, drinking status, sleep duration, social activities and eGFR | | | | | | |
| Abbreviations: CTI, C-reactive protein-triglyceride-glucose index; HR, Hazard Ratio; CI, Confidence Interval; Q, quartile; Ref, reference; eGFR, estimated glomerular filtration rate. | | | | | | |

**Supplementary Table S4.** Sensitivity analysis restricted to participants with complete covariate data.

| **Characteristic** | **Model 1** | **P-value** | **Model 2** | **P-value** | **Model 3** | **P-value** |
| --- | --- | --- | --- | --- | --- | --- |
| **HR (95%CI)** | **HR (95%CI)** | **HR (95%CI)** |
| **Frailty by CTI** |  |  |  |  |  |  |
| **CTI (per 1 unit increase)** | 1.412 (1.267, 1.574) | **<0.001** | 1.359 (1.217, 1.517) | **<0.001** | 1.366 (1.222, 1.527) | **<0.001** |
| **Quartile CTI** |  |  |  |  |  |  |
| Q1 | Ref. |  | Ref. |  | Ref. |  |
| Q2 | 1.278 (1.049, 1.556) | 0.015 | 1.208 (0.992, 1.471) | 0.060 | 1.200 (0.985, 1.462) | 0.070 |
| Q3 | 1.431 (1.180, 1.735) | <0.001 | 1.317 (1.086, 1.598) | 0.005 | 1.283 (1.056, 1.558) | 0.012 |
| Q4 | 1.678 (1.391, 2.025) | **<0.001** | 1.564 (1.295, 1.888) | **<0.001** | 1.577 (1.304, 1.907) | **<0.001** |
| **P for trend** |  | **<0.001** |  | **<0.001** |  | **<0.001** |
|  |  |  |  |  |  |  |
| **Frailty by cumCTI** |  |  |  |  |  |  |
| **cumCTI (per 1 unit increase)** | 1.159 (1.113, 1.207) | **<0.001** | 1.145 (1.099, 1.193) | **<0.001** | 1.144 (1.097, 1.193) | **<0.001** |
| **Quartile cumCTI** |  |  |  |  |  |  |
| Q1 | Ref. |  | Ref. |  | Ref. |  |
| Q2 | 1.270 (1.040, 1.553) | 0.019 | 1.237 (1.012, 1.512) | 0.038 | 1.210 (0.989, 1.479) | 0.063 |
| Q3 | 1.559 (1.285, 1.891) | <0.001 | 1.476 (1.216, 1.791) | <0.001 | 1.455 (1.198, 1.768) | <0.001 |
| Q4 | 1.789 (1.480, 2.162) | **<0.001** | 1.700 (1.406, 2.056) | **<0.001** | 1.674 (1.381, 2.029) | **<0.001** |
| **P for trend** |  | **<0.001** |  | **<0.001** |  | **<0.001** |
|  |  |  |  |  |  |  |
| **Frailty by CTI change** |  |  |  |  |  |  |
| **CTI change** |  |  |  |  |  |  |
| Cluster 3 | Ref. |  | Ref. |  | Ref. |  |
| Cluster 2 | 1.372 (1.172, 1.605) | <0.001 | 1.319 (1.127, 1.544) | <0.001 | 1.296 (1.106, 1.518) | 0.001 |
| Cluster 1 | 1.752 (1.469, 2.091) | **<0.001** | 1.664 (1.394, 1.986) | **<0.001** | 1.641 (1.371, 1.963) | **<0.001** |
| **P for trend** |  | **<0.001** |  | **<0.001** |  | **<0.001** |
| Model 1: unadjusted for any covariates | | | | | | |
| Model 2: adjusted for age, sex and marital status | | | | | | |
| Model 3: adjusted for age, sex and marital status, education level, geographic region, smoking status, drinking status, sleep duration, social activities and eGFR | | | | | | |
| Abbreviations: CTI, C-reactive protein-triglyceride-glucose index; HR, Hazard Ratio; CI, Confidence Interval; Q, quartile; Ref, reference; eGFR, estimated glomerular filtration rate. | | | | | | |

**Supplementary Table S5.** Sensitivity analysis excluding participants who died during follow-up.

| **Characteristic** | **Model 1** | **P-value** | **Model 2** | **P-value** | **Model 3** | **P-value** |
| --- | --- | --- | --- | --- | --- | --- |
| **HR (95%CI)** | **HR (95%CI)** | **HR (95%CI)** |
| **Frailty by CTI** |  |  |  |  |  |  |
| **CTI (per 1 unit increase)** | 1.392 (1.240, 1.563) | **<0.001** | 1.337 (1.189, 1.503) | **<0.001** | 1.342 (1.192, 1.511) | **<0.001** |
| **Quartile CTI** |  |  |  |  |  |  |
| Q1 | Ref. |  | Ref. |  | Ref. |  |
| Q2 | 1.241 (1.004, 1.532) | 0.045 | 1.181 (0.956, 1.459) | 0.123 | 1.191 (0.964, 1.472) | 0.105 |
| Q3 | 1.473 (1.201, 1.808) | <0.001 | 1.354 (1.103, 1.662) | 0.004 | 1.337 (1.087, 1.643) | 0.006 |
| Q4 | 1.605 (1.312, 1.963) | **<0.001** | 1.510 (1.234, 1.848) | **<0.001** | 1.532 (1.249, 1.878) | **<0.001** |
| **P for trend** |  | **<0.001** |  | **<0.001** |  | **<0.001** |
|  |  |  |  |  |  |  |
| **Frailty by cumCTI** |  |  |  |  |  |  |
| **cumCTI (per 1 unit increase)** | 1.155 (1.106, 1.207) | **<0.001** | 1.139 (1.090, 1.190) | **<0.001** | 1.139 (1.089, 1.191) | **<0.001** |
| **Quartile cumCTI** |  |  |  |  |  |  |
| Q1 | Ref. |  | Ref. |  | Ref. |  |
| Q2 | 1.230 (0.990, 1.528) | 0.062 | 1.210 (0.974, 1.504) | 0.085 | 1.188 (0.956, 1.477) | 0.120 |
| Q3 | 1.654 (1.347, 2.031) | <0.001 | 1.560 (1.270, 1.916) | <0.001 | 1.542 (1.254, 1.896) | <0.001 |
| Q4 | 1.752 (1.429, 2.148) | **<0.001** | 1.667 (1.359, 2.045) | **<0.001** | 1.656 (1.346, 2.036) | **<0.001** |
| **P for trend** |  | **<0.001** |  | **<0.001** |  | **<0.001** |
|  |  |  |  |  |  |  |
| **Frailty by CTI change** |  |  |  |  |  |  |
| **CTI change** |  |  |  |  |  |  |
| Cluster 3 | Ref. |  | Ref. |  | Ref. |  |
| Cluster 2 | 1.422 (1.203, 1.679) | <0.001 | 1.366 (1.156, 1.614) | <0.001 | 1.351 (1.142, 1.598) | <0.001 |
| Cluster 1 | 1.701 (1.405, 2.059) | **<0.001** | 1.618 (1.336, 1.959) | **<0.001** | 1.606 (1.323, 1.950) | **<0.001** |
| **P for trend** |  | **<0.001** |  | **<0.001** |  | **<0.001** |
| Model 1: unadjusted for any covariates | | | | | | |
| Model 2: adjusted for age, sex and marital status | | | | | | |
| Model 3: adjusted for age, sex and marital status, education level, geographic region, smoking status, drinking status, sleep duration, social activities and eGFR | | | | | | |
| Abbreviations: CTI, C-reactive protein-triglyceride-glucose index; HR, Hazard Ratio; CI, Confidence Interval; Q, quartile; Ref, reference; eGFR, estimated glomerular filtration rate. | | | | | | |

**Supplementary Table S6.** Sensitivity analysis excluding participants who developed frailty within the first 2 years of follow-up.

| **Characteristic** | **Model 1** | **P-value** | **Model 2** | **P-value** | **Model 3** | **P-value** |
| --- | --- | --- | --- | --- | --- | --- |
| **HR (95%CI)** | **HR (95%CI)** | **HR (95%CI)** |
| **Frailty by CTI** |  |  |  |  |  |  |
| **CTI (per 1 unit increase)** | 1.361 (1.211, 1.530) | **<0.001** | 1.305 (1.159, 1.468) | **<0.001** | 1.295 (1.149, 1.460) | **<0.001** |
| **Quartile CTI** |  |  |  |  |  |  |
| Q1 | Ref. |  | Ref. |  | Ref. |  |
| Q2 | 1.297 (1.051, 1.600) | 0.015 | 1.235 (1.001, 1.524) | 0.049 | 1.227 (0.994, 1.514) | 0.057 |
| Q3 | 1.427 (1.161, 1.754) | <0.001 | 1.316 (1.070, 1.618) | 0.009 | 1.282 (1.041, 1.578) | 0.019 |
| Q4 | 1.607 (1.312, 1.967) | **<0.001** | 1.506 (1.230, 1.845) | **<0.001** | 1.503 (1.225, 1.845) | **<0.001** |
| **P for trend** |  | **<0.001** |  | **<0.001** |  | **<0.001** |
|  |  |  |  |  |  |  |
| **Frailty by cumCTI** |  |  |  |  |  |  |
| **cumCTI (per 1 unit increase)** | 1.140 (1.091, 1.192) | **<0.001** | 1.125 (1.076, 1.176) | **<0.001** | 1.118 (1.069, 1.170) | **<0.001** |
| **Quartile cumCTI** |  |  |  |  |  |  |
| Q1 | Ref. |  | Ref. |  | Ref. |  |
| Q2 | 1.237 (0.998, 1.533) | 0.052 | 1.212 (0.978, 1.502) | 0.079 | 1.177 (0.950, 1.460) | 0.136 |
| Q3 | 1.553 (1.265, 1.908) | <0.001 | 1.470 (1.196, 1.806) | <0.001 | 1.442 (1.172, 1.773) | <0.001 |
| Q4 | 1.673 (1.365, 2.051) | **<0.001** | 1.595 (1.300, 1.956) | **<0.001** | 1.550 (1.260, 1.906) | **<0.001** |
| **P for trend** |  | **<0.001** |  | **<0.001** |  | **<0.001** |
|  |  |  |  |  |  |  |
| **Frailty by CTI change** |  |  |  |  |  |  |
| **CTI change** |  |  |  |  |  |  |
| Cluster 3 | Ref. |  | Ref. |  | Ref. |  |
| Cluster 2 | 1.384 (1.171, 1.634) | <0.001 | 1.329 (1.125, 1.570) | <0.001 | 1.299 (1.098, 1.536) | 0.002 |
| Cluster 1 | 1.598 (1.318, 1.937) | **<0.001** | 1.516 (1.250, 1.839) | **<0.001** | 1.476 (1.214, 1.795) | **<0.001** |
| **P for trend** |  | **<0.001** |  | **<0.001** |  | **<0.001** |
| Model 1: unadjusted for any covariates | | | | | | |
| Model 2: adjusted for age, sex and marital status | | | | | | |
| Model 3: adjusted for age, sex and marital status, education level, geographic region, smoking status, drinking status, sleep duration, social activities and eGFR | | | | | | |
| Abbreviations: CTI, C-reactive protein-triglyceride-glucose index; HR, Hazard Ratio; CI, Confidence Interval; Q, quartile; Ref, reference; eGFR, estimated glomerular filtration rate. | | | | | | |
